# Supplementary material for: Optimization of steam explosion parameters for improved biotechnological use of wheat straw
Source: Springer Nature journal article supplement (doi:10.1007/s13399-020-01266-z), 2021-01-12
Supplement: MOESM1 [file 13399_2020_1266_MOESM1_ESM.pdf]

Fig. S1

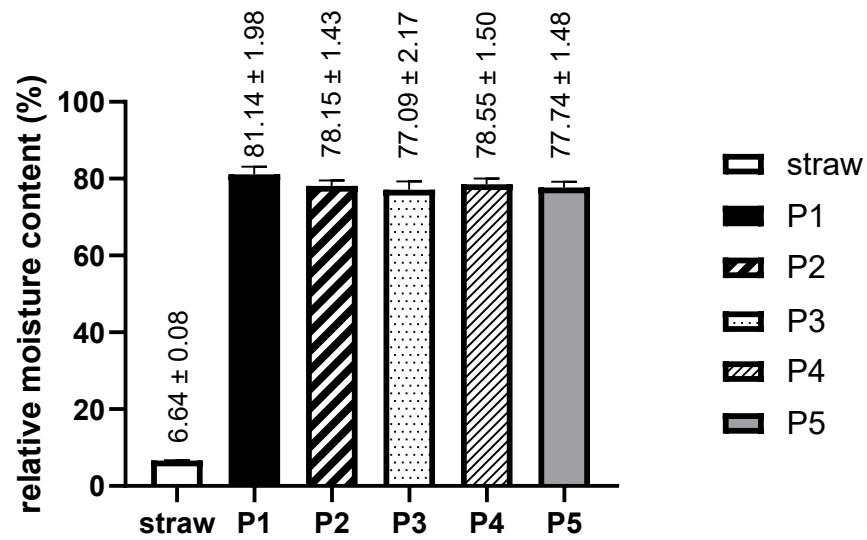

Journal of Biomass Conversion and Biorefinery

## Optimization of steam explosion parameters for improved biotechnological use of wheat straw

Daniel Sulzenbacher<sup>1</sup>, Denise Atzmüller<sup>2</sup>, Felix Hawe<sup>1</sup>, Manuela Richter<sup>1</sup>, Alvaro Cristobal-Sarramian<sup>1</sup> & Alexander Zwirzitz<sup>1,\*</sup>

<sup>1</sup> University of Applied Sciences Upper Austria, Stelzhamerstraße 23, 4600 Wels, Austria

<sup>2</sup> Ludwig Boltzmann Institute for Rare and Undiagnosed Diseases, Lazarettgasse 14, 1090 Vienna, Austria

\* corresponding author: [alexander.zwirzitz@fh-wels.at](mailto:alexander.zwirzitz@fh-wels.at), ORCID: 0000-0002-0703-0005
