# Supplementary material for: Optimization of steam explosion parameters for improved biotechnological use of wheat straw
Source: Springer Nature journal article supplement (doi:10.1007/s13399-020-01266-z), 2021-01-12
Supplement: MOESM3 [file 13399_2020_1266_MOESM3_ESM.pdf]

Table S3

| Run | Temperature (°C) | Residence time (min.) |
|-----|------------------|-----------------------|
| 1   | 190              | 5                     |
| 2   | 190              | 10                    |
| 3   | 190              | 20                    |
| 4   | 175.858          | 12.5                  |
| 5   | 175.858          | 12.5                  |
| 6   | 190              | 1.8934                |
| 7   | 190              | 23.1066               |
| 8   | 200              | 5                     |
| 9   | 200              | 10                    |
| 10  | 200              | 15                    |
| 11  | 204.142          | 12.5                  |
| 12  | 204.142          | 12.5                  |
| 13  | 200              | 20                    |
| 14  | 200              | 10                    |
| 15  | 180              | 5                     |
| 16  | 180              | 20                    |
| 17  | 180              | 20                    |
| 18  | 180              | 15                    |

Journal of Biomass Conversion and Biorefinery

## Optimization of steam explosion parameters for improved biotechnological use of wheat straw

Daniel Sulzenbacher<sup>1</sup>, Denise Atzmüller<sup>2</sup>, Felix Hawe<sup>1</sup>, Manuela Richter<sup>1</sup>, Alvaro Cristobal-Sarramian<sup>1</sup> & Alexander Zwirzitz<sup>1,\*</sup>

<sup>1</sup> University of Applied Sciences Upper Austria, Stelzhamerstraße 23, 4600 Wels, Austria

<sup>2</sup> Ludwig Boltzmann Institute for Rare and Undiagnosed Diseases, Lazarettgasse 14, 1090 Vienna, Austria

\* corresponding author: [alexander.zwirzitz@fh-wels.at](mailto:alexander.zwirzitz@fh-wels.at), ORCID: 0000-0002-0703-0005
